# Supplementary material
Source: MDPI journal article supplement (https://www.mdpi.com/1999-4907/15/5/866)
Supplement: s1 [file s1]

**Table S1.** Genetic characteristics of *J. sabina* populations. N<sub>PL</sub> – ploidy level, N – number of samples, N<sub>G</sub> – number of distinct genetic individuals, A – mean number of alleles per locus, H<sub>o</sub> – observed heterozygosity, H<sub>s</sub> – gene diversity, G<sub>is</sub> – inbreeding coefficient, P(HWE) – P value for HWE, \* - statistically significant values after sequential Bonferroni's correction.

| Country         | Pops | Mountain range | Location  |           | N <sub>PL</sub> | N   | N <sub>G</sub> | A   | H <sub>o</sub> | H <sub>s</sub> | G <sub>is</sub> | P(HWE)   |          |
|-----------------|------|----------------|-----------|-----------|-----------------|-----|----------------|-----|----------------|----------------|-----------------|----------|----------|
|                 |      |                | Lat (N)   | Lon (W/E) |                 |     |                |     |                |                |                 |          |          |
| EUROPE          |      |                |           |           |                 |     |                |     |                |                |                 |          |          |
| Spain           | SP7  | Cantabrians    | 42.88     | -5.87     | 2n              | 20  | 18             | 4.6 | 0.35           | 0.48           | 0.26            | 0.005*   |          |
| Austria         | AU3  | Alps           | 47.11     | 13.46     | 2n              | 20  | 18             | 3.3 | 0.50           | 0.60           | 0.17            | 0.060    |          |
|                 | AU4  |                | 47.00     | 12.43     | 2n              | 20  | 15             | 3.3 | 0.38           | 0.48           | 0.22            | 0.024    |          |
| Romania         | RO1  | Carpathians    | 45.20     | 24.08     | 4n              | 19  | 16             | 4.0 | 0.40           | 0.58           | 0.31            | <0.0001* |          |
|                 | RO2  | Apuseni        | 46.48     | 23.33     | 4n              | 20  | 20             | 5.6 | 0.42           | 0.64           | 0.34            | <0.0001* |          |
|                 | RO3  | Carpathians    | 46.82     | 25.85     | 2n              | 20  | 13             | 5.3 | 0.41           | 0.67           | 0.38            | <0.0001* |          |
| Italy           | IT1  | Alps           | 45.68     | 7.16      | 2n              | 21  | 17             | 4.0 | 0.43           | 0.56           | 0.24            | 0.012    |          |
|                 | IT3  |                | Apennines | 42.10     | 14.18           | 4n  | 20             | 16  | 5.6            | 0.61           | 0.72            | 0.15     | <0.0001* |
|                 | IT4  |                |           | 39.91     | 16.28           | 4n  | 20             | 16  | 5.6            | 0.46           | 0.72            | 0.36     | <0.0001* |
| Croatia         | CRO  |                | 44.24     | 15.81     | 4n              | 20  | 18             | 4.6 | 0.48           | 0.66           | 0.27            | <0.0001* |          |
| North Macedonia | NM   | Balkans        | 41.59     | 20.66     | 4n              | 21  | 19             | 5.3 | 0.36           | 0.52           | 0.31            | <0.0001* |          |
| Greece          | GR   |                | 41.14     | 22.24     | 4n              | 20  | 20             | 6.0 | 0.60           | 0.71           | 0.16            | <0.0001* |          |
| Bulgaria        | BG   |                | 42.26     | 23.54     | 4n              | 20  | 19             | 5.6 | 0.56           | 0.66           | 0.14            | <0.0001* |          |
| Poland          | PL*  | Carpathians    | 49.40     | 20.42     | 2n              | 22  | 7              | 2.3 | 0.38           | 0.31           | -0.22           | 0.323    |          |
| ASIA            |      |                |           |           |                 |     |                |     |                |                |                 |          |          |
| Georgia         | GEO  | Caucasus       | 42.37     | 42.62     | 2n              | 24  | 19             | 5.0 | 0.40           | 0.58           | 0.30            | 0.001*   |          |
| Kyrgyzstan      | KYR  | Tian-Shan      | 43.00     | 77.36     | 2n              | 28  | 13             | 4.0 | 0.34           | 0.46           | 0.25            | 0.060    |          |
| Overall         |      |                |           |           |                 | 335 | 264            | 4.6 | 0.44           | 0.59           | 0.25            | <0.0001* |          |

\* Leaf samples were taken from the Kórnik Arboretum of the Institute of Dendrology of Polish Academy of Sciences.
